# Supplementary material
Source: Springer Nature journal article supplement (https://www.springermedizin.de/resource/supplementary/12955_2013_1182_MOESM1_ESM.pdf/9559000)
Supplement: MOESM1 [file 9559000]

**Study 1:**  
8 focus groups (N=38 FMS patients)

Content analysis and item  
generation (69 items)

**Study 2:**  
Cognitive interviews (N=10 FMS patients)

Item revision  
(47 items remained)

**Study 3:**  
Psychometric testing (N=256 FMS patients, three  
measurement time points)

Testing distribution  
properties  
(39 items remained)

Exploratory factor analysis  
(32 items remained)

Testing unidimensionality  
(29 items remained)

Testing Rasch model fit  
(27 items remained = final  
version)
